# Supplementary material for: Lifetime ovulatory years and risk of epithelial ovarian cancer: a multinational pooled analysis
Source: PubMed Central journal article supplement (PMC10165492; doi:10.1093/jnci/djad011), 2023-05-08

## Supplementary Material

**Supplementary Table 1. Algorithms to calculate lifetime ovulatory years (LOY).**

| Algorithms #                                                                        | Number of sites included | Sites included                                                                                                              | Variables included in LOY algorithms |                 |                                              |                                                                    |                                  | LOY algorithms <sup>a,b</sup>                                                                            |
|-------------------------------------------------------------------------------------|--------------------------|-----------------------------------------------------------------------------------------------------------------------------|--------------------------------------|-----------------|----------------------------------------------|--------------------------------------------------------------------|----------------------------------|----------------------------------------------------------------------------------------------------------|
|                                                                                     |                          |                                                                                                                             | Age at last menstrual period         | Age at menarche | Number of pregnancies, regardless of outcome | Total number of months of being pregnant, regardless of outcome(s) | Total number of full-term births |                                                                                                          |
| The first class of algorithms: includes only ovulation suppression due to pregnancy |                          |                                                                                                                             |                                      |                 |                                              |                                                                    |                                  |                                                                                                          |
| A                                                                                   | 25                       | AUS, BAV, CON, DOV, GER, HAW, HOP, JPN, MAY, MCC, NCO, NEC, NJO, NTH, OVA, POL, SON, STA, SWH, TBO, TOR, UCI, UKO, USC, VTL | X                                    | X               | X                                            |                                                                    |                                  | Menstrual span – number of pregs *0.75                                                                   |
| B                                                                                   | 22                       | AUS, CON, DOV, GER, HAW, HOP, JPN, MCC, NCO, NEC, NJO, NTH, OVA, POL, SON, STA, SWH, TBO, TOR, UCI, UKO, USC                | X                                    | X               |                                              |                                                                    | X                                | Menstrual span – number of full-term births *0.75                                                        |
| C                                                                                   | 22                       | AUS, CON, DOV, GER, HAW, HOP, JPN, MCC, NCO, NEC, NJO, NTH, OVA, POL, SON, STA, SWH, TBO, TOR, UCI, UKO, USC                | X                                    | X               | X                                            |                                                                    | X                                | Menstrual span – number of full-term births *0.75 - (number of pregs – number of full-term births) *0.25 |
| D                                                                                   | 13                       | AUS, DOV, GER, HAW, MCC, NCO, NJO, OVA, POL, STA, TBO, UCI, USC                                                             | X                                    | X               |                                              | X                                                                  |                                  | Menstrual span –(months of being pregnant)/12                                                            |

The second class of algorithms: each of the first-class algorithms with the addition of ovulation suppression due to oral contraceptive use

|   |    |                                                                                                                        |   |   |   |   |  |     |                                                      |
|---|----|------------------------------------------------------------------------------------------------------------------------|---|---|---|---|--|-----|------------------------------------------------------|
| E | 24 | AUS, CON, DOV, GER, HAW, HOP, JPN, MAY, MCC, NCO, NEC, NJO, NTH, OVA, POL, SON, STA, SWH, TBO, TOR, UCI, UKO, USC, VTL | X | X | X |   |  | X   | Algorithm A – (months of oral contraceptive use)/12  |
| F | 22 | AUS, CON, DOV, GER, HAW, HOP, JPN, MCC, NCO, NEC, NJO, NTH, OVA, POL, SON, STA, SWH, TBO, TOR, UCI, UKO, USC           | X | X |   |   |  | X X | Algorithm B - (months of oral contraceptive use)/12  |
| G | 22 | AUS, CON, DOV, GER, HAW, HOP, JPN, MCC, NCO, NEC, NJO, NTH, OVA, POL, SON, STA, SWH, TBO, TOR, UCI, UKO, USC           | X | X | X |   |  | X X | Algorithm C 0- (months of oral contraceptive use)/12 |
| H | 13 | AUS, DOV, GER, HAW, MCC, NCO, NJO, OVA, POL, STA, TBO, UCI, USC                                                        | X | X |   | X |  | X   | Algorithm D - (months of oral contraceptive use)/12  |

The third class of algorithms: each of the second class of algorithms with the addition of ovulation suppression due to breastfeeding

|   |    |                                                                                     |   |   |   |   |  |       |                                            |
|---|----|-------------------------------------------------------------------------------------|---|---|---|---|--|-------|--------------------------------------------|
| I | 17 | AUS, CON, DOV, GER, HAW, HOP, JPN, NCO, NEC, NJO, NTH, POL, SON, STA, SWH, TOR, USC | X | X | X |   |  | X X   | Algorithm E – (months of breastfeeding)/12 |
| J | 17 | AUS, CON, DOV, GER, HAW, HOP, JPN, NCO, NEC, NJO, NTH, POL, SON, STA, SWH, TOR, USC | X | X |   |   |  | X X X | Algorithm F - (months of breastfeeding)/12 |
| K | 17 | AUS, CON, DOV, GER, HAW, HOP, JPN, NCO, NEC, NJO, NTH, POL, SON, STA, SWH, TOR, USC | X | X | X |   |  | X X X | Algorithm G - (months of breastfeeding)/12 |
| L | 9  | AUS, DOV, GER, HAW, NCO, NJO, POL, STA, USC                                         | X | X |   | X |  | X X   | Algorithm H - (months of breastfeeding)/12 |

<sup>a</sup>Each algorithm starts with menstrual span defined as age at last menstrual period minus age at menarche. The first class of algorithms exclude from LOY estimates of ovulation suppression based on pregnancies using four different approaches. Subsequent classes of algorithms exclude from LOY estimates ovulation suppression based on oral contraceptive use (second class) and both OC use and breastfeeding (third class). The fourth class of algorithms adjusts LOY based on average cycle length.

<sup>b</sup>The menstrual span is defined as age at last menstrual period minus age at menarche

**Supplementary Table 2. Comparison of observed and assigned values of age at last menstrual period (LMP)**

|                                                           | Observations with a known age at menopause < 60 years |                 |                                                 |                 | Observations with age at menopause missing or >60 years |                 | Combining observations with known age at menopause <60 and imputed values for observations with age at menopause missing or >60 |                 | Using imputed values for all observations |                 |
|-----------------------------------------------------------|-------------------------------------------------------|-----------------|-------------------------------------------------|-----------------|---------------------------------------------------------|-----------------|---------------------------------------------------------------------------------------------------------------------------------|-----------------|-------------------------------------------|-----------------|
|                                                           | Using age at menopause as age at LMP                  |                 | Using imputation algorithm to assign age at LMP |                 | Using imputation algorithm to assign age at LMP         |                 |                                                                                                                                 |                 |                                           |                 |
|                                                           | Controls                                              | Cases           | Controls                                        | Cases           | Controls                                                | Cases           | Controls                                                                                                                        | Cases           | Controls                                  | Cases           |
| Studies that recorded age at menopause <sup>a,b</sup>     |                                                       |                 |                                                 |                 |                                                         |                 |                                                                                                                                 |                 |                                           |                 |
| N                                                         | 7162                                                  | 5974            | 7162                                            | 5974            | 1154                                                    | 907             | 8316                                                                                                                            | 6881            | 8316                                      | 6881            |
| CON,<br>DOV,<br>HOP,<br>NEC,<br>POL,<br>SON,<br>TOR       | 47.12<br>(6.15)                                       | 47.00<br>(6.23) | 48.34<br>(5.77)                                 | 48.41<br>(5.96) | 50.58<br>(2.52)                                         | 50.22<br>(3.68) | 47.60<br>(5.90)                                                                                                                 | 47.42<br>(6.06) | 48.71<br>(5.54)                           | 48.70<br>(5.79) |
| Studies that did not record age at menopause <sup>c</sup> |                                                       |                 |                                                 |                 |                                                         |                 |                                                                                                                                 |                 |                                           |                 |
| N                                                         |                                                       |                 |                                                 |                 | 17,888                                                  | 14,386          |                                                                                                                                 |                 | 17,888                                    | 14,386          |
| All<br>Others<br>Studies <sup>d</sup>                     | NA                                                    | NA              | NA                                              | NA              | 48.67<br>(5.92)                                         | 48.65<br>(6.13) | NA                                                                                                                              | NA              | 48.67<br>(5.92)                           | 48.65<br>(6.13) |

<sup>a</sup>Seven studies in OCAC recorded age at menopause. For observations with an age at menopause < 60, we assigned that age as the age at LMP (average age at LMP was 47.12 years for controls, 47.00 for cases). To assess our imputation algorithm, we imputed age at LMP for these observations using our imputation algorithm (Figure 2). The imputed average age at LMP for these observations was 48.34 for controls and 48.41 for cases. We then applied our imputation algorithm to the observations in those 7 studies that were missing age at menopause or recorded age at menopause as > 60 years old (average age at LMP was 50.58 for controls, 50.22 for cases). Combining the actual observed values when known and imputed data for missing data, the average age at LMP for these 7 studies was 47.60 for controls and 47.42 for cases. When using imputation for all observations in these 7 studies, the average at LMP was 48.71 for cases and 48.70 for controls.

<sup>b</sup>There are 315 participants without menopause status in the OCAC core dataset.

<sup>c</sup>We then applied our imputation algorithm (Figure 2) to the remaining studies that did not have a recorded age at menopause for any observation. The imputed average age at LMP for all observations in these studies was 48.67 for controls and 48.65 for cases. NA, not applicable.

<sup>d</sup>There are 2004 participants without menopause status in the OCAC core dataset.

**Supplementary Table 3. Percentage of missing values in components of lifetime ovulatory years calculation by OCAC site**

| study            | Age at menarche |       | Hysterectomy |       | Age at hysterectomy (among women with hysterectomy) |       | HRT use (no matter what type) |       | First age using HRT (among women with HRT) |       | Age at last menstrual period |       |
|------------------|-----------------|-------|--------------|-------|-----------------------------------------------------|-------|-------------------------------|-------|--------------------------------------------|-------|------------------------------|-------|
|                  | controls        | cases | controls     | cases | controls                                            | cases | controls                      | cases | controls                                   | cases | controls                     | cases |
| AUS              | 3.7             | 7.2   | 1.1          | 5.0   | 1.0                                                 | 1.8   | 0                             | 5.2   | 3.6                                        | 16.6  | 100                          | 100   |
| BAV              | 46.9            | 36.7  | 41.3         | 55.9  | 59.1                                                | 6.5   | 48.2                          | 46.8  | 100                                        | 100   | 100                          | 100   |
| CON <sup>1</sup> | 0               | 0     | 0            | 0     | 3.2                                                 | 5.4   | 100                           | 100   | -                                          | -     | 0.7                          | 1.2   |
| DOV <sup>1</sup> | 0               | 0.1   | 0            | 0     | 0                                                   | 0     | 0                             | 0     | 0.1                                        | 0     | 34.2                         | 30.0  |
| GER              | 1.1             | 2.7   | 0            | 0     | 0                                                   | 0     | 0                             | 0     | 0                                          | 1.9   | 100                          | 100   |
| HAW              | 0               | 0.1   | 0            | 0     | 0                                                   | 0     | 0                             | 0     | 0                                          | 0     | 100                          | 100   |
| HOP              | 0               | 0     | 0            | 0     | 0                                                   | 0     | 1.9                           | 1.9   | 0.2                                        | 0.4   | 5.3                          | 4.4   |
| JPN              | 4.7             | 0     | 0            | 0.7   | 100                                                 | 100   | 2.6                           | 0.7   | 100                                        | 54.6  | 100                          | 100   |
| MAY              | 6.6             | 17.4  | 100          | 22.6  | 100                                                 | 100   | 5.2                           | 22.5  | 11.5                                       | 10.4  | 100                          | 100   |
| MCC              | 16.1            | 41.6  | 4.5          | 100   | -                                                   | -     | 100                           | 100   | -                                          | -     | 100                          | 100   |
| NCO              | 0.3             | 0.5   | 0.1          | 0.2   | 1.2                                                 | 1.23  | 0.1                           | 0.2   | 0                                          | 0     | 100                          | 100   |
| NEC              | 0.4             | 0.4   | 0            | 0     | 0                                                   | 0     | 0                             | 0     | 6.4                                        | 4.5   | 3.0                          | 2.9   |
| NJO              | 0.7             | 0.8   | 0            | 100   | -                                                   | -     | 0                             | 0     | 0.7                                        | 8.6   | 100                          | 100   |
| NTH              | 0.8             | 14.0  | 0.5          | 2.3   | 3.5                                                 | 0.6   | 21.2                          | 1.5   | 44.0                                       | 13.6  | 100                          | 100   |
| OVA              | 1.8             | 2.5   | 0.1          | 0.1   | 2.7                                                 | 5.0   | 0                             | 0     | 3.2                                        | 5.7   | 100                          | 100   |
| POL              | 1.6             | 1.0   | 0            | 0.3   | 1.7                                                 | 0     | 5.7                           | 6.8   | 1.9                                        | 2.9   | 1.4                          | 3.4   |
| SON              | 0               | 0     | 0            | 0     | 0                                                   | 0     | 0                             | 0     | 1.0                                        | 1.2   | 0.2                          | 0.4   |
| STA              | 0               | 2.1   | 0            | 0.6   | 1.6                                                 | 1.2   | 0                             | 0.3   | 0                                          | 0     | 100                          | 100   |
| SWH              | 0.1             | 0     | 0            | 0     | 0                                                   | 0     | 100                           | 100   | -                                          | -     | 100                          | 100   |
| TBO              | 41.5            | 12.3  | 92.2         | 46.0  | 6.7                                                 | 2.89  | 100                           | 100   | -                                          | -     | 100                          | 100   |
| TOR              | 0.3             | 0.1   | 0            | 0.4   | 0                                                   | 0     | 0                             | 0     | 100                                        | 100   | 0.3                          | 0.5   |
| UCI              | 7.8             | 6.8   | 7.2          | 6.3   | 0.6                                                 | 4.6   | 11.9                          | 7.7   | 1.5                                        | 0.9   | 100                          | 100   |
| UKO              | 11              | 20.6  | 11.9         | 23.4  | 3.8                                                 | 5.5   | 10.4                          | 12.5  | 4.4                                        | 6.5   | 100                          | 100   |
| USC              | 0.04            | 0.1   | 0            | 0     | 0                                                   | 0     | 0                             | 0     | 0                                          | 0     | 100                          | 100   |
| VTL              | 2.4             | 3.9   | 0            | 0     | 100                                                 | 100   | 100                           | 100   | -                                          | -     | 100                          | 100   |

**Supplementary Table 3 (cont'd)**

| study            | Number of Pregnancies, regardless of outcome |       | Total number of months of being pregnant, regardless of outcome(s) |       | Total number of full-term births |       | Total months of breastfeeding (among parous women) |       | Duration of Oral Contraceptive Use, months |       |
|------------------|----------------------------------------------|-------|--------------------------------------------------------------------|-------|----------------------------------|-------|----------------------------------------------------|-------|--------------------------------------------|-------|
|                  | controls                                     | cases | controls                                                           | cases | controls                         | cases | controls                                           | cases | controls                                   | cases |
| AUS              | 0                                            | 5.2   | 4.0                                                                | 22.4  | 0                                | 4.8   | 12.4                                               | 25.5  | 0.5                                        | 5.8   |
| BAV              | 45.3                                         | 32.6  | 91.4                                                               | 88.5  | 91.4                             | 88.4  | 57.9                                               | 80.6  | 87.0                                       | 87.7  |
| CON <sup>1</sup> | 0                                            | 0     | 100                                                                | 100   | 0                                | 0     | 10.5                                               | 14.9  | 0                                          | 0     |
| DOV <sup>1</sup> | 0.05                                         | 0.1   | 0.6                                                                | 0.6   | 0                                | 0.2   | 10.5                                               | 17.0  | 0                                          | 0.2   |
| GER              | 0                                            | 0     | 0                                                                  | 0     | 0                                | 0     | 15.0                                               | 20.2  | 1.1                                        | 1.2   |
| HAW              | 0                                            | 0     | 0                                                                  | 0     | 0                                | 0     | 11.3                                               | 22.5  | 0                                          | 0     |
| HOP              | 0                                            | 0     | 90.7                                                               | 81.6  | 0                                | 0     | 9.3                                                | 18.5  | 0                                          | 0.1   |
| JPN              | 2.2                                          | 2.0   | 87.5                                                               | 80.3  | 2.1                              | 0.7   | 16.3                                               | 22.4  | 2.2                                        | 2.0   |
| MAY              | 4.4                                          | 10.4  | 100                                                                | 100   | 100                              | 100   | 100                                                | 100   | 7.2                                        | 12.9  |
| MCC              | 16.4                                         | 41.6  | 16.3                                                               | 42.2  | 16.3                             | 42.2  | 37.2                                               | 65.9  | 18.1                                       | 43.9  |
| NCO              | 0                                            | 0.1   | 0.4                                                                | 0.5   | 0                                | 0.1   | 9.2                                                | 16.2  | 3.2                                        | 4.4   |
| NEC              | 0                                            | 0     | 86.8                                                               | 75.3  | 0                                | 0     | 13.2                                               | 24.7  | 0.05                                       | 0.2   |
| NJO              | 0                                            | 0.4   | 0.4                                                                | 0.4   | 0                                | 0.4   | 10.5                                               | 25.3  | 2.2                                        | 3.4   |
| NTH              | 17.5                                         | 1.1   | 99.7                                                               | 2.3   | 16.5                             | 1.1   | 18.3                                               | 25.3  | 2.3                                        | 2.0   |
| OVA              | 0.1                                          | 0.1   | 27.1                                                               | 42.3  | 0.04                             | 0.1   | 31.5                                               | 50.9  | 0.9                                        | 1.1   |
| POL              | 0                                            | 0.3   | 0.1                                                                | 0.7   | 0                                | 0.3   | 27.6                                               | 39.1  | 1.7                                        | 2.0   |
| SON              | 0                                            | 0.2   | 100                                                                | 100   | 0                                | 0     | 9.7                                                | 19.3  | 0                                          | 0     |
| STA              | 0                                            | 0     | 0                                                                  | 0     | 0                                | 0     | 24.0                                               | 38.9  | 0                                          | 0.8   |
| SWH              | 0                                            | 0     | 100                                                                | 100   | 0                                | 0     | 2.3                                                | 3.9   | 0.1                                        | 0     |
| TBO              | 0.5                                          | 0.7   | 49.3                                                               | 49.1  | 1.9                              | 2.8   | 54.1                                               | 28.1  | 44.9                                       | 15.4  |
| TOR              | 0                                            | 0     | 93.2                                                               | 80.9  | 0                                | 0     | 0                                                  | 0     | 0                                          | 0     |
| UCI              | 6.7                                          | 6.1   | 6.7                                                                | 6.1   | 6.7                              | 6.1   | 55.0                                               | 24.5  | 7                                          | 6.8   |
| UKO              | 12.2                                         | 21.7  | 91.3                                                               | 82.7  | 12.2                             | 21.7  | 37.4                                               | 52.4  | 16.5                                       | 26.7  |
| USC              | 0                                            | 0     | 0                                                                  | 0.04  | 0                                | 0     | 39                                                 | 39.3  | 0.2                                        | 0.1   |
| VTL              | 10.5                                         | 11.7  | 100                                                                | 100   | 100                              | 100   | 100                                                | 100   | 1.6                                        | 3.9   |

**Supplementary Table 4. Distribution of lifetime ovulatory years calculated from 12 algorithms among participants with complete data**

| Algorithm | Number of sites included | Controls N (%) | Cases N (%)   | mean  | standard deviation | median | 25th, 75th percentile |
|-----------|--------------------------|----------------|---------------|-------|--------------------|--------|-----------------------|
| A         | 25                       | 25,081 (55.6)  | 20,046 (44.4) | 33.85 | 5.98               | 35.25  | 32.00, 37.50          |
| B         | 22                       | 22,519 (55.6)  | 18,013 (44.4) | 34.25 | 5.91               | 35.75  | 32.50, 37.50          |
| C         | 22                       | 22,509 (55.6)  | 18,003 (44.4) | 34.11 | 5.93               | 35.50  | 32.25, 37.50          |
| D         | 13                       | 13,617 (56.0)  | 10,689 (44.0) | 34.12 | 6.21               | 35.75  | 32.25, 37.70          |
| E         | 24                       | 24,480 (55.9)  | 19,323 (44.1) | 30.06 | 8.31               | 32.33  | 26.00, 35.75          |
| F         | 22                       | 22,316 (55.7)  | 17,772 (44.3) | 30.58 | 8.18               | 32.92  | 26.50, 36.25          |
| G         | 22                       | 22,306 (55.7)  | 17,762 (44.3) | 30.43 | 8.19               | 32.75  | 26.50, 36.17          |
| H         | 14                       | 13,515 (56.1)  | 10,576 (43.9) | 30.16 | 8.45               | 32.50  | 25.83, 36.17          |
| I         | 17                       | 14,900 (56.8)  | 11,829 (43.2) | 29.58 | 7.95               | 31.67  | 25.50, 35.20          |
| J         | 17                       | 14,902 (56.8)  | 11,339 (43.2) | 30.10 | 7.88               | 32.25  | 26.17, 35.53          |
| K         | 17                       | 14,900 (56.8)  | 11,329 (43.2) | 29.92 | 7.89               | 32.00  | 26.00, 35.50          |
| L         | 9                        | 8,473 (56.6)   | 6,498 (43.4)  | 29.85 | 8.13               | 32.08  | 25.50, 35.50          |

**Supplementary Table 5. Pairwise correlations of lifetime ovulatory years calculated from 12 algorithms limiting to cases and controls with complete data in each algorithm in the pair-wise comparison**

| Algorithms | A      | B      | C      | D      | E      | F      | G      | H      | I      | J      | K      | L      |
|------------|--------|--------|--------|--------|--------|--------|--------|--------|--------|--------|--------|--------|
| A          | 1.0000 |        |        |        |        |        |        |        |        |        |        |        |
| B          | 0.9919 | 1.0000 |        |        |        |        |        |        |        |        |        |        |
| C          | 0.9964 | 0.9991 | 1.0000 |        |        |        |        |        |        |        |        |        |
| D          | 0.9791 | 0.9831 | 0.9835 | 1.0000 |        |        |        |        |        |        |        |        |
| E          | 0.7474 | 0.7526 | 0.7556 | 0.7398 | 1.0000 |        |        |        |        |        |        |        |
| F          | 0.7488 | 0.7556 | 0.7547 | 0.7556 | 0.9957 | 1.0000 |        |        |        |        |        |        |
| G          | 0.7529 | 0.7559 | 0.7562 | 0.7566 | 0.9981 | 0.9995 | 1.0000 |        |        |        |        |        |
| H          | 0.7431 | 0.7472 | 0.7472 | 0.7567 | 0.9888 | 0.9996 | 0.9998 | 1.0000 |        |        |        |        |
| I          | 0.7607 | 0.7553 | 0.7588 | 0.7540 | 0.9968 | 0.9915 | 0.9944 | 0.9936 | 1.0000 |        |        |        |
| J          | 0.7469 | 0.7556 | 0.7544 | 0.7506 | 0.9918 | 0.9967 | 0.9962 | 0.9963 | 0.9949 | 1.0000 |        |        |
| K          | 0.7524 | 0.7564 | 0.7567 | 0.7526 | 0.9946 | 0.9961 | 0.9967 | 0.9966 | 0.9978 | 0.9994 | 1.0000 |        |
| L          | 0.7466 | 0.7517 | 0.7516 | 0.7522 | 0.9937 | 0.9962 | 0.9965 | 0.9967 | 0.9969 | 0.9996 | 0.9998 | 1.0000 |

**Supplementary Table 6. Correlations (rho) between individual components and the corresponding lifetime ovulatory years from 12 algorithms using complete data**

| Components                                                         | A       | B       | C       | D       | E       | F       | G       | H       | I       | J       | K       | L       |
|--------------------------------------------------------------------|---------|---------|---------|---------|---------|---------|---------|---------|---------|---------|---------|---------|
| Age at last menstrual period                                       | 0.9313  | 0.9399  | 0.9386  | 0.9242  | 0.7193  | 0.7332  | 0.7331  | 0.7226  | 0.7291  | 0.7278  | 0.7290  | 0.7272  |
| Age at menarche                                                    | -0.2502 | -0.2533 | -0.2532 | -0.2296 | -0.1511 | -0.1519 | -0.1521 | -0.1416 | -0.1599 | -0.1608 | -0.1607 | -0.1351 |
| Number of pregnancies, regardless of outcome                       | -0.0488 | NA      | -0.0028 | NA      | -0.0181 | NA      | 0.0528  | NA      | -0.0284 | NA      | -0.0089 | NA      |
| Total number of months of being pregnant, regardless of outcome(s) | NA      | NA      | NA      | -0.0944 | NA      | NA      | NA      | -0.0165 | NA      | NA      | NA      | -0.0404 |
| Total number of full-term births                                   | NA      | 0.0502  | 0.0480  | NA      | NA      | 0.1001  | 0.0984  | NA      | NA      | 0.0636  | 0.0660  | NA      |
| Total months of breastfeeding                                      | NA      | NA      | NA      | NA      | NA      | NA      | NA      | NA      | -0.1326 | -0.1311 | -0.1318 | -0.1254 |
| Duration of oral contraceptive use, months                         | NA      | NA      | NA      | NA      | -0.6939 | -0.6884 | -0.6874 | -0.6775 | -0.6916 | -0.6992 | -0.6974 | -0.6940 |



**Supplementary Figure 1: Forest Plot from Meta-Analysis of the Association Between Lifetime Ovulatory Years and Epithelial Ovarian Cancer.** Using algorithm K, we conducted a meta-analysis and pooled estimate using (A) all studies and (B) excluding JPN and SWH.

**A.**

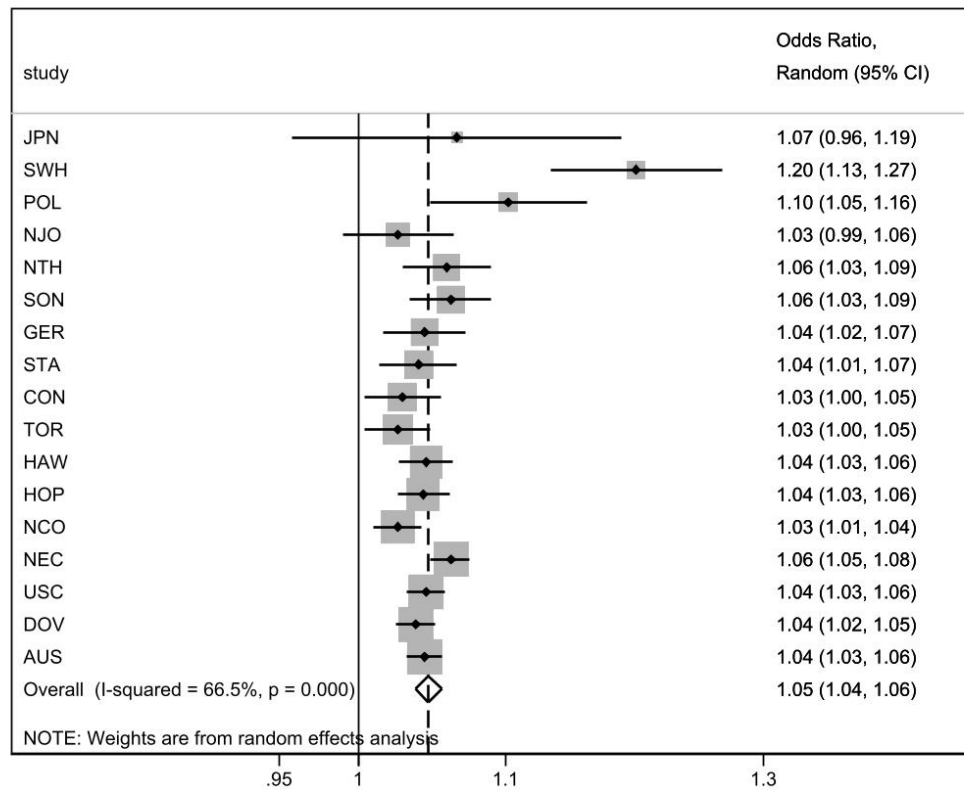

**B.**

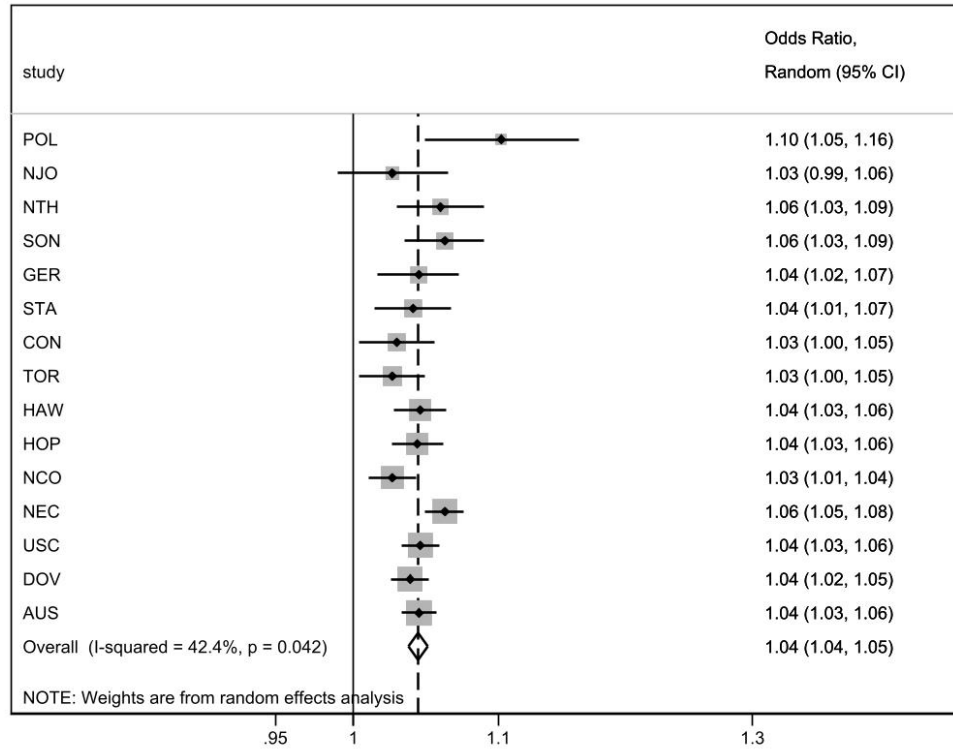

Supplement: djad011_supplementary_data.pdf [file djad011_supplementary_data.pdf]
